# Supplementary material
Source: publisher figshare collection journal article supplement (https://gsajournals.figshare.com/articles/dataset/_/16934209)
Supplement: Supplementary file 1 [file 2]

## Sheet: Table S1
TABLE S1: Reads per Library.
Species	Line	# of Reads
D. melanogaster	RAL304	19300000
D. melanogaster	RAL307	27500000
D. melanogaster	RAL357	22900000
D. melanogaster	RAL360	17100000
D. melanogaster	RAL399	21900000
D. melanogaster	RAL517	16000000
D. melanogaster	RAL304xRAL307	32800000
D. melanogaster	RAL357xRAL399	35100000
D. melanogaster	RAL360xRAL517	30200000
D. simulans	Lara 10	20700000
D. simulans	W501 (library 1)	24639508
D. simulans	W501 (library 2)	23571239
D. simulans	W501 (library 3)	26531200
D. yakuba	TAI18E2 (library 1)	31400000
D. yakuba	TAI18E2 (library 2)	22700000

## Sheet: Table S2
TABLE S2: AG-expressed de novo Gene Information
Ch	Start	Stop	ID	399	304	360	357	307	517	357x399	307x304	360x517	Mean	NonZeroMean	N	Longest Length	Exon	Type	Cluster
3R	6698122	6698686	TRINITY_DN31642_c0_g1	0	0	0	0	0	1.02008	0	0	0.055949	0.17	1.02	1	565	1	Intergenic	NA
3R	7687951	7688797	TRINITY_DN38055_c0_g1	0.467867	0.089499	12.217	0.146757	0.564171	0.090427	0.535053	0.778266	4.70998	2.263	12.217	1	868	1	Intronic	NA
3R	8892725	8893156	TRINITY_DN4456_c0_g1	4.10012	8.45989	3.10104	6.11475	4.15469	4.01128	6.19837	6.60862	5.7226	4.99	4.99	6	432	1	Intronic	NA
3R	11903291	11922819	TRINITY_DN6960_c0_g1	0.100234	0	1.14235	0.832781	0.198761	0.907588	0.141418	0.129946	0.517223	0.53	1.142	1	532	3,2	Intronic	NA
3R	12582827	12583479	TRINITY_DN8103_c0_g1	0.215106	1.45901	1.86741	0.892784	0.064341	0.950551	0.218443	0.66052	2.08143	0.908	1.663	2	596	2	Intronic	NA
3R	13620372	13620922	TRINITY_DN45723_c0_g1	0.138528	1.39298	0	0.520501	0.13387	0	0.358926	0.804961	0.051921	0.364	1.393	1	551	1	Intergenic	NA
3R	14680041	14682244	TRINITY_DN4891_c0_g2	0.354365	0.013704	0.072005	0.562517	0.267728	1.1692	0.007483	0.038056	0	0.407	1.169	1	2214	1,1	Intronic	NA
3R	14968389	14968739	TRINITY_DN40288_c0_g1	0	0	0	1.23096	0	0	0.232525	0	0	0.205	1.231	1	351	1	Intergenic	NA
3R	15974503	15974962	TRINITY_DN43_c0_g1	0.125018	0	0.642394	0.094416	0.100887	1.26209	0.080593	0.071363	0.153246	0.371	1.262	1	460	1	Intronic	NA
3R	16163361	16163980	TRINITY_DN45841_c0_g1	0	0	1.87144	0	0	0	0.050705	0	0.449723	0.312	1.871	1	559	2	Intronic	NA
3R	16907931	16908313	TRINITY_DN42156_c0_g1	0	0	1.91164	0	0	0	0.069192	0	0.224911	0.319	1.912	1	383	1	Intronic	NA
3R	17273557	17274002	TRINITY_DN29238_c0_g1	0	1.31991	0.077644	0.275909	0.126895	0.093592	0.0433	0.127733	0.146716	0.316	1.32	1	445	1	Intergenic	NA
3R	17520078	17520505	TRINITY_DN35049_c0_g1	0.097109	0	0	6.12291	0.429313	0	6.58038	0.087017	0	1.108	6.123	1	578	2	Intergenic	NA
3R	19685676	19686139	TRINITY_DN45341_c0_g1	0.389911	0.264846	0.412961	0.668124	0.080095	14.9097	0.253062	0.065672	5.06224	2.788	14.91	1	483	1	Intronic	NA
3R	20052851	20053196	TRINITY_DN15969_c0_g1	0	0	0	2.06826	0	0	0.742693	0	0	0.345	2.068	1	392	1	Intronic	NA
3R	21443599	21443956	TRINITY_DN18539_c0_g2	0	0.334165	0.184246	1.05249	0	0	0.270897	0	0	0.262	1.052	1	358	1	Intronic	NA
3R	21710727	21712682	TRINITY_DN9859_c0_g1	0	0.116732	1.10315	3.88558	0	1.79602	1.37187	0.011579	0.784669	1.15	2.262	3	1965	1,1,1	Intronic	NA
3R	21856948	21857826	TRINITY_DN4679_c0_g1	0.794313	0.863421	2.1075	2.52218	0.812551	1.15279	0.958663	0.606411	1.4455	1.375	1.927	3	871	1	Intergenic	NA
3R	22189379	22193094	TRINITY_DN10355_c0_g2	2.37728	0.239776	0.101664	0.619227	1.77605	2.10569	1.34516	1.06041	0.626632	1.203	2.086	3	667	2	Intronic	NA
3R	24437407	24437709	TRINITY_DN2083_c0_g1	0	1.92623	0	0	0.062261	0	0	0.549474	0	0.331	1.926	1	314	1	Intronic	NA
3R	24478094	24479080	TRINITY_DN13148_c2_g3	0	0.199511	0	1.39151	0	0	0.239033	0.026846	0	0.265	1.392	1	987	1	Intergenic	NA
3R	24811204	24811908	TRINITY_DN42840_c0_g1	0.711158	0.123487	2.39749	0.096302	1.14957	2.17334	0.597235	0.501755	1.3761	1.109	1.907	3	705	1,2	Intronic	NA
3R	25434341	25434653	TRINITY_DN20247_c0_g2	0	0	0	0	0	1.06322	0	0	0.091905	0.177	1.063	1	313	1	Intronic	NA
3R	25529679	25530303	TRINITY_DN2770_c0_g1	3.84155	0.094757	0	0	3.26623	0.122546	3.37833	1.32133	0	1.221	3.554	2	625	2,1	Intronic	NA
3R	25643352	25644098	TRINITY_DN6653_c0_g2	0	0	1.72406	1.15614	0	0.018456	0.40005	0	0.477132	0.483	1.44	2	748	1	Intronic	NA
3R	26179849	26180511	TRINITY_DN37766_c0_g1	3.45577	0	0	6.9299	4.80534	2.54379	10.2533	1.72474	0.765967	2.956	4.434	4	664	1	Intronic	NA
3R	28054751	28056067	TRINITY_DN7414_c0_g1	0.112209	0.204147	0	19.0752	0	2.8381	1.90546	0.186366	0.075506	3.705	10.957	2	1325	1,1	Intronic	NA
3R	28619930	28620331	TRINITY_DN9552_c0_g1	0	0.129643	0.16408	0.478099	0.166125	1.05837	0.066273	0.049069	0.196195	0.333	1.058	1	404	1	Intronic	NA
3R	28666814	28667378	TRINITY_DN39108_c0_g1	0.494579	0.482697	2.84854	0	0.318228	0.721732	0.023213	0.363239	1.57805	0.811	2.849	1	575	2,1,1	Intergenic	NA
3R	29399448	29400416	TRINITY_DN5019_c0_g1	0.885094	0.030253	0	0	1.0992	0.433542	0.530677	0.525325	0.119562	0.408	1.099	1	968	1,2	Intronic	NA
3R	29881516	29881937	TRINITY_DN14634_c0_g1	0.1307	0	0.234456	0	0	1.38417	0.009687	0	0.08577	0.292	1.384	1	423	1	Intronic	NA
3R	29893540	29893987	TRINITY_DN17901_c0_g3	0.011086	0	0.073619	0	0	1.02791	0	0.095726	0	0.185	1.028	1	451	1	Intronic	NA
3R	30891612	30893496	TRINITY_DN6560_c0_g1	0	2.26934	0	0	0	0	0	0.426079	0	0.378	2.269	1	1948	2,3	Intergenic	NA
3R	31307107	31307455	TRINITY_DN717_c2_g1	0.55426	1.55186	0.996016	0.543553	0.78055	0.645209	0.972187	0.235784	0.895353	0.845	1.552	1	349	1	Intergenic	NA
3R	31318921	31319678	TRINITY_DN12679_c0_g1	0	1.16672	0.215806	0	0.027377	0.203594	0.048544	0	0.041704	0.269	1.167	1	757	1	Intronic	1
3R	31320295	31322116	TRINITY_DN9935_c0_g2	0.143469	1.22059	0.270447	0.103157	0.02982	0.149328	0.06785	0.09469	0.032531	0.319	1.221	1	1826	1	Intronic	1
3R	31329568	31329975	TRINITY_DN33385_c0_g1	0.128138	0.201766	2.10248	0.548153	0.166919	0	0.830219	0.483473	0.373448	0.525	2.102	1	408	1	Intronic	1
3L	5491210	5491576	TRINITY_DN45834_c0_g1	0	3.50257	0	0	0	0	0	1.3746	0	0.584	3.503	1	367	1	Intergenic	NA
3L	6816460	6816860	TRINITY_DN29625_c0_g1	0	2.58678	0.164489	0	0	0	0	1.80576	0.059518	0.459	2.587	1	402	1	Intergenic	NA
3L	10844446	10845840	TRINITY_DN11060_c0_g1	0.725809	0	0.290986	1.34588	0.712886	0	0.390232	0.263957	0.190758	0.513	1.346	1	1346	2	Intronic	NA
3L	10866637	10867024	TRINITY_DN32904_c0_g1	0.291044	0	0.2669	0.082344	0.334029	1.29692	0.053042	0	0.097767	0.379	1.297	1	388	1	Intronic	NA
3L	11339397	11339706	TRINITY_DN7723_c2_g1	1.44951	0	1.23835	0.431575	0.660887	0	0.477903	0.380838	0.150409	0.63	1.344	2	309	1	Intergenic	NA
3L	11351631	11352118	TRINITY_DN20968_c0_g1	0.107131	0	0	0.051149	0.069971	1.79628	0	0	1.95271	0.337	1.796	1	477	1	Intergenic	NA
3L	13319680	13320460	TRINITY_DN44337_c0_g1	0.119153	4.18355	0.088679	0	0.387738	0	0.053642	0	0.086659	0.797	4.184	1	781	1	Intergenic	NA
3L	15478206	15478578	TRINITY_DN38001_c0_g1	3.84532	0.316758	2.54291	0.608287	2.35333	0.104722	0.690066	0.758134	0.6246	1.629	2.914	3	381	1	Intergenic	NA
3L	15695879	15696452	TRINITY_DN3948_c0_g1	0	0.567471	0.341866	0.998855	0.032866	1.1095	0.390467	0.12669	0.402576	0.508	1.11	1	574	1,1	Intergenic	NA
3L	17375118	17376972	TRINITY_DN12138_c0_g2	0.189392	1.09558	0.452152	0.1673	0.188204	0.187659	0.145162	0.157275	0.238338	0.38	1.096	1	1865	1	Intronic	NA
3L	17596259	17596667	TRINITY_DN29050_c0_g1	0.119516	0.215753	0.358023	0.269745	0	1.01778	0	0	0	0.33	1.018	1	409	1	Intronic	NA
3L	18452673	18454011	TRINITY_DN7014_c0_g1	3.99132	0	2.55791	0	3.15531	20.3828	2.42683	0.85582	10.7268	5.015	7.522	4	962	3,3,3,2	Intergenic	NA
3L	19082459	19082831	TRINITY_DN13862_c0_g1	0.473555	0.079388	0.265255	0.267673	0.018208	1.01129	0	0	0	0.353	1.011	1	373	1	Intronic	2
3L	19084431	19084734	TRINITY_DN1722_c1_g1	0	0	0	0.212657	0.008067	1.00526	0	0.030991	0	0.204	1.005	1	302	1	Intronic	2
3L	22232526	22233127	TRINITY_DN41612_c0_g1	0.450287	0.358587	0.304792	0.303261	0.781554	1.77037	0.984757	0.241595	0.914734	0.661	1.77	1	611	1	Intronic	NA
2L	165440	165874	TRINITY_DN31409_c0_g1	0.089537	0.085772	0.288303	0	0.193421	1.2818	0	0.04027	0.070548	0.323	1.282	1	435	1	Intronic	NA
2L	179310	179717	TRINITY_DN40245_c0_g1	0.340206	0.213378	0	0.122355	0.062421	1.22396	0.019348	0.070717	0.048482	0.327	1.224	1	408	1	Intronic	NA
2L	435083	435725	TRINITY_DN32779_c0_g1	0.58866	0.231183	0.420072	1.0551	0.337987	1.19056	0.282799	0.442993	0.75882	0.637	1.123	2	642	1	Intronic	NA
2L	2464890	2465434	TRINITY_DN16210_c0_g1	0	0	0	0	0	1.43696	0	0.040245	0.152257	0.239	1.437	1	546	1	Intergenic	NA
2L	2473812	2474522	TRINITY_DN32398_c0_g1	0	0	0	0	0.036881	1.2135	0.024386	0	0.050018	0.208	1.214	1	711	1	Intergenic	NA
2L	3137204	3137560	TRINITY_DN43455_c0_g1	0	0	0	1.02009	0	0	0.029219	0	0	0.17	1.02	1	357	1	Intronic	NA
2L	3249419	3249908	TRINITY_DN45939_c0_g1	0	0	5.42017	0	0.077	0	0.166852	0.227119	17.5604	0.916	5.42	1	492	1	Intergenic	NA
2L	4038628	4039517	TRINITY_DN5946_c0_g1	0.687572	0.783212	0.636255	1.29542	0.269198	5.75079	0.702746	0.709569	2.61184	1.57	3.523	2	889	1,1	Intronic	NA
2L	5233508	5234287	TRINITY_DN6555_c1_g2	0.145781	0.673476	0.202109	0.50625	0.055628	1.68304	0.141322	0.07115	0.072747	0.544	1.683	1	780	1	Intronic	NA
2L	5775340	5775851	TRINITY_DN6469_c0_g1	0.562114	1.03699	1.16267	0.641563	0.742813	0.149592	0.513186	0.444495	0.711564	0.716	1.1	2	512	1,2	Intronic	NA
2L	5789784	5790124	TRINITY_DN24440_c0_g1	0.081256	1.01687	0.088011	0.119313	0.110093	0.247068	0	0	0.092702	0.277	1.017	1	341	1	Intronic	NA
2L	5872983	5873565	TRINITY_DN3872_c0_g1	0.143927	0.243293	1.79665	2.34834	0.227481	1.15215	0.507508	0.370163	1.26554	0.985	1.766	3	593	1,2	Intronic	NA
2L	6809740	6810324	TRINITY_DN33021_c0_g1	0	1.44616	0	0	0	0	0	0.083795	0	0.241	1.446	1	586	1	Intergenic	NA
2L	10835378	10836675	TRINITY_DN41064_c0_g1	0	0	1.82813	0	0	0	0	0	0.128405	0.305	1.828	1	1273	1	Intronic	NA
2L	11503854	11504203	TRINITY_DN39186_c0_g1	0	0	0	1.69066	0	0.109416	0.648421	0.208192	0.072706	0.3	1.691	1	350	1	Intronic	NA
2L	11723989	11725471	TRINITY_DN6872_c0_g1	0.228165	0.668168	0	1.06053	0.141709	0.582499	0.726136	0.305436	0.57681	0.447	1.061	1	1267	3,2	Intergenic	NA
2L	12157164	12157774	TRINITY_DN28193_c0_g1	0	0	1.24579	0	0	0	0	0	1.14287	0.208	1.246	1	781	1	Intronic	NA
2L	13135513	13135846	TRINITY_DN16796_c0_g1	0	1.0701	0	0	0	0	0	0	0	0.178	1.07	1	334	1	Intergenic	3
2L	13136839	13137942	TRINITY_DN8109_c0_g2	0	1.84912	0	0	0	0	0	0.231877	0.016035	0.308	1.849	1	1115	1	Intergenic	3
2L	13148401	13148742	TRINITY_DN13188_c0_g1	0	1.10827	0	0	0	0	0	0.088668	0	0.185	1.108	1	342	1	Intergenic	4
2L	13151513	13151933	TRINITY_DN21755_c0_g2	0	2.02077	0	0.004743	0	0.103698	0	0.129374	0	0.355	2.021	1	416	1	Intergenic	4
2L	13156501	13157211	TRINITY_DN38089_c0_g1	0	1.8096	0	0.105319	0	0	0.051349	0.103728	0.151165	0.319	1.81	1	711	1	Intergenic	4
2L	13584586	13586118	TRINITY_DN6398_c0_g1	0.629715	0.611163	0.384875	1.73144	0.49064	0.201095	0.900201	0.338873	0.286317	0.675	1.731	1	1534	1	Intronic	5
2L	13587932	13588355	TRINITY_DN1677_c2_g1	0	0.118726	0	2.07337	0	0.13006	0.768304	0	0	0.387	2.073	1	435	1,2	Intronic	5
2L	13590199	13591120	TRINITY_DN7632_c0_g2	0.043094	1.03159	0.10731	0	0.057905	0.083486	0.051217	0.156626	0.102857	0.221	1.032	1	921	1	Intronic	5
2L	15351290	15352238	TRINITY_DN4706_c0_g2	0	0.062406	1.09922	0.317727	0	0.040354	0.212704	0.062202	0.354587	0.253	1.099	1	973	1	Intergenic	NA
2L	15818982	15819633	TRINITY_DN3048_c0_g1	12.4414	1.67951	0.613128	0.343494	16.2949	0.630232	5.72535	7.08026	0.44132	5.334	10.139	3	687	1,1,2,2	Intergenic	NA
2L	15833452	15833839	TRINITY_DN33935_c0_g1	0	1.17607	0	0	0	0	0.047593	0	0	0.196	1.176	1	388	1	Intergenic	NA
2L	17056293	17056843	TRINITY_DN41292_c0_g1	0	0	0	2.68903	0.040058	0.134139	0.146078	0	0.091793	0.477	2.689	1	551	1	Intergenic	6
2L	17065890	17069356	TRINITY_DN325_c0_g1	0	28.8646	0.056088	52.6573	0	0	14.9101	10.2236	20.4904	13.596	40.761	2	1175	2,2	Intergenic	6
2L	17237152	17237886	TRINITY_DN4701_c0_g1	0.530626	0.317872	1.41433	0.6269	0.765127	0.414217	0.555022	0.595235	0.840174	0.678	1.414	1	736	1,2	Intronic	7
2L	17238615	17244932	TRINITY_DN7874_c0_g1	5.11071	4.06668	5.9347	5.52733	4.7537	2.93484	3.73517	4.24401	4.30868	4.721	4.721	6	725	1,2	Intronic	7
2L	18366333	18366717	TRINITY_DN33178_c0_g1	0.18332	0	0.101082	2.11225	0	0.178049	0.91643	0.068824	0.093192	0.429	2.112	1	408	1	Intronic	NA
2L	19870522	19871081	TRINITY_DN6880_c0_g1	1.55067	0.315682	0.10424	0	0.911251	0.090268	0.639862	0.35461	0.414617	0.495	1.551	1	577	1	Intronic	8
2L	19871962	19872544	TRINITY_DN7077_c0_g1	1.25768	0.482523	1.18457	0.841722	1.1112	0.79547	0.469306	0.380263	0.877581	0.946	1.184	3	595	1	Intronic	8
2L	19877124	19877424	TRINITY_DN6788_c0_g1	1.44943	0.110183	0	0	0.123041	0	0.100218	0.342462	0.064063	0.28	1.449	1	301	1	Intronic	8
2L	20012317	20018109	TRINITY_DN41416_c0_g1	0.517277	0.636732	0.561714	0.034099	0.311435	1.53065	0.222803	0.645117	0.642034	0.599	1.531	1	415	1,2	Intronic	NA
2L	20020243	20020647	TRINITY_DN36715_c0_g1	0.072289	0.115522	0.539081	0.467162	0.067542	1.0893	0.3484	0.141028	0.29582	0.392	1.089	1	406	1	Intergenic	NA
2L	20235423	20236257	TRINITY_DN8918_c0_g1	0	0	0	0	0.070716	1.57631	0.027855	0.062409	0.19724	0.275	1.576	1	837	1	Intergenic	9
2L	20237706	20240115	TRINITY_DN6596_c0_g2	0.709807	0.259399	0.233308	0.139678	1.09308	2.56623	0.356624	0.304649	0.915618	0.834	1.83	2	1870	1,2	Intergenic	9
2L	21932665	21933652	TRINITY_DN35043_c0_g1	0.670976	0.029971	0.229049	1.17791	0.214162	0	0.289946	0.060045	0.083028	0.387	1.178	1	988	1	Intergenic	10
2L	21936979	21937398	TRINITY_DN31992_c0_g1	0.471766	0	0	1.08103	0.214703	0	0.12955	0.039956	0.219398	0.295	1.081	1	420	1	Intergenic	10
2L	22319447	22319772	TRINITY_DN9230_c0_g3	0.245364	0.237983	0.539213	0.083457	0.206012	1.18998	0	0.05238	0.094058	0.417	1.19	1	326	1	Intronic	NA
2R	7271236	7271498	TRINITY_DN16342_c0_g1	0.063611	1.13718	0	0	0	0.14561	0	0.095712	0	0.224	1.137	1	311	1	Intergenic	NA
2R	8655943	8656275	TRINITY_DN33386_c0_g1	0	0	0.099039	0.22487	0	1.06837	0	0	0.104897	0.232	1.068	1	333	1	Intronic	NA
2R	9626842	9627203	TRINITY_DN7207_c0_g1	0.263567	1.02659	0.18221	0.137903	0.005733	0	0	0.073197	0	0.269	1.027	1	365	1	Intronic	11
2R	9633555	9634603	TRINITY_DN44730_c0_g1	0.123848	1.85377	0	0.068053	0	0.064252	0	0.121807	0	0.352	1.854	1	1129	1,2	Intronic	11
2R	11063926	11064313	TRINITY_DN28666_c0_g1	0	0	0.01615	0.109363	0.194486	1.02253	0	0.029214	0	0.224	1.023	1	388	1	Intronic	NA
2R	11548147	11548727	TRINITY_DN21087_c0_g1	1.38619	0	0	0	0	0	0.001213	0.002787	0	0.231	1.386	1	582	1	Intergenic	NA
2R	14082472	14083087	TRINITY_DN29646_c0_g1	0.12773	0.639343	0.499519	0.282426	0.056963	1.01273	0	0.067151	0.06829	0.436	1.013	1	617	1	Intronic	NA
2R	14531938	14532323	TRINITY_DN21238_c0_g1	0.06772	0.368228	0.123034	0.258658	0	1.35225	0	0.00572	0.574082	0.362	1.352	1	386	1	Intronic	12
2R	14534201	14534692	TRINITY_DN3017_c3_g1	0.063225	1.33493	0.067033	0	0	0.472467	0	0.05984	0.182151	0.323	1.335	1	485	1	Intronic	12
2R	14920915	14921432	TRINITY_DN34420_c0_g1	0	0	2.35635	0	0	0.128637	0	0	1.25683	0.414	2.356	1	518	1	Intronic	NA
2R	16966620	16967254	TRINITY_DN34849_c0_g1	1.94507	0	0.99823	0	1.44058	1.00895	2.42186	1.69568	0.821895	0.899	1.465	3	630	1	Intergenic	NA
2R	17290064	17291138	TRINITY_DN6078_c0_g1	0.523531	1.1258	0.124557	0.250534	0.40187	0.219442	0.017964	0.019526	0	0.441	1.126	1	1075	1	Intronic	NA
2R	18530781	18531276	TRINITY_DN29192_c0_g1	0.24559	19.1694	0	0.470526	0.049065	0	0.380254	12.8123	0.235173	3.322	19.169	1	496	1	Intronic	NA
2R	20300655	20301415	TRINITY_DN21129_c0_g1	0	1.17124	0	0	0	0	0	0.290108	0	0.195	1.171	1	762	1	Intergenic	NA
2R	20759923	20761341	TRINITY_DN3017_c1_g1	1.64393	1.55227	0	0	1.36377	0	1.37283	1.18722	0	0.76	1.52	3	1421	2,1,3	Intergenic	NA
2R	21593267	21593754	TRINITY_DN5525_c0_g1	0	0	0.33791	0.238864	0	1.01546	0	0	0.181377	0.265	1.015	1	488	1	Intergenic	NA
2R	22532202	22532873	TRINITY_DN45797_c0_g1	0.070796	0.468852	0.195819	0.111059	0.051935	1.07421	0.003356	0	0	0.329	1.074	1	689	1	Intronic	NA
2R	23190094	23190499	TRINITY_DN38327_c0_g1	0	0	0.394785	1.16687	0.026485	0.094324	0.36629	0	0.03893	0.28	1.167	1	410	1	Intronic	NA
2R	23710531	23710954	TRINITY_DN1423_c1_g1	0	0	1.78512	0	0	0	0	0	0.517785	0.298	1.785	1	450	1	Intergenic	NA
2R	24546321	24546985	TRINITY_DN31852_c0_g1	0.041667	0.337974	2.73015	0.53228	0.334167	1.72301	0.32721	0.486335	1.25685	0.95	2.227	2	667	1	Intronic	NA
4	95871	96271	TRINITY_DN7043_c0_g1	0.194258	0	0.082245	0	0.064922	1.25105	0.006327	0.169887	0.1147	0.265	1.251	1	401	1	Intronic	NA
4	967548	968077	TRINITY_DN15229_c0_g1	0	0.155322	0	1.15666	0	0.216767	0.243623	0	0.081116	0.255	1.157	1	530	1	Intronic	NA
X	953327	953934	TRINITY_DN15371_c0_g1	1.38267	1.88677	1.6669	5.88748	0.714888	1.80266	2.74897	2.72502	2.70672	2.224	2.525	5	608	1	Intergenic	NA
X	1586228	1586861	TRINITY_DN5989_c1_g1	1.18661	0.522641	0.290266	0.594485	1.54848	0.684971	0.876448	0.2229	0.564916	0.805	1.368	2	634	1	Intronic	NA
X	2767254	2768564	TRINITY_DN1675_c1_g1	6.48942	0.03501	0.064903	0.5232	6.45198	0.030963	0.074835	0.049069	0.017361	2.266	6.471	2	1311	2,1	Intronic	NA
X	3715233	3715553	TRINITY_DN11524_c0_g1	3.78013	3.20932	1.17639	2.42374	2.58469	0.510607	1.32134	0.552598	0.148701	2.281	2.635	5	330	1	Intronic	NA
X	4169914	4170247	TRINITY_DN9344_c0_g1	0	0.241675	0	0	0.099133	1.10776	0	0	0	0.241	1.108	1	335	1	Intronic	13
X	4176188	4177233	TRINITY_DN6200_c0_g4	0.405096	0.185427	0.049817	0.283968	0.194062	1.09285	0	0	0.019644	0.369	1.093	1	1033	1	Intronic	13
X	4965867	4966813	TRINITY_DN28772_c0_g1	0.142609	0.371462	0.290957	0.396595	0.123965	1.05996	0.102088	0	0.083594	0.398	1.06	1	951	1,1	Intronic	NA
X	4980892	4981361	TRINITY_DN5560_c0_g1	0.431033	0.719501	0.361377	1.00708	0.263465	0.483991	0.032991	0.091771	0	0.544	1.007	1	484	1	Intronic	NA
X	5197618	5198535	TRINITY_DN5341_c0_g1	0.66619	0.505648	1.12287	0.831353	0.093359	1.14219	0.309066	0.101711	0.60378	0.727	1.133	2	796	2,1	Intronic	NA
X	9456767	9457622	TRINITY_DN12859_c0_g2	0.153909	0.607801	0	0.208782	0	1.13589	0.022231	0	0	0.351	1.136	1	858	1	Intronic	NA
X	10435958	10436721	TRINITY_DN2063_c0_g1	6.80717	12.294	0.377285	31.3352	7.08201	22.6813	19.5122	6.74769	20.9315	13.429	16.04	5	765	2,1,2,3	Intronic	NA
X	10579517	10580339	TRINITY_DN4095_c0_g2	0.495804	4.61482	6.00774	4.16656	0.915289	1.33546	1.50587	1.45776	1.76532	2.923	4.031	4	823	1	Intronic	NA
X	15303018	15303302	TRINITY_DN9441_c0_g1	0	0.245205	0	1.01156	0	0.464921	0.066771	0.072829	0	0.287	1.012	1	303	1	Intronic	NA
X	15599808	15600240	TRINITY_DN34682_c0_g1	0.194994	1.24191	0	0.115291	0.043568	0.826936	0.108081	0.184603	0.611785	0.404	1.242	1	433	1	Intergenic	NA
X	18597407	18599092	TRINITY_DN8012_c1_g1	1.87802	0.410805	0	0	1.87644	0	1.65792	1.61657	0	0.694	1.877	2	1691	1	Intergenic	14
X	18599926	18600634	TRINITY_DN44707_c0_g1	7.13156	2.04943	0	0	6.99845	0	8.68073	7.80673	0	2.697	5.393	3	709	1	Intergenic	14

## Sheet: Table S3
TABLE S3: Screened Out Testis de novo Genes.
Testis de novo Gene	Species with Matching Transcripts
Gene_fixed_050	D.yakuba,D.simulans
Gene_fixed_004	D.ananassae
Gene_fixed_090	D.yakuba
Gene_fixed_104	D.simulans
Gene_fixed_076	D.simulans
Gene_fixed_051	D.simulans
Gene_fixed_003	D.yakuba
Gene_fixed_066	D.yakuba,D.simulans
Gene_X_140	D.yakuba
Gene_fixed_069	D.yakuba
Gene_fixed_031	D.simulans
Gene_fixed_062	D.yakuba
Gene_3R_124	D.simulans
Gene_fixed_044	D.ananassae,D.yakuba
Gene_fixed_028	D.simulans
Gene_fixed_029	D.yakuba
Gene_3L_089	D.simulans
Gene_2L_039	D.ananassae
Gene_fixed_006	D.yakuba
Gene_fixed_079	D.yakuba
Gene_fixed_096	D.yakuba
Gene_fixed_014	D.yakuba
Gene_fixed_022	D.yakuba
Gene_fixed_087	D.yakuba
Gene_3L_074	D.simulans
Gene_2L_013	D.simulans
Gene_3R_128	D.yakuba,D.simulans
Gene_fixed_002	D.yakuba
Gene_fixed_061	D.simulans
Gene_fixed_093	D.yakuba
Gene_fixed_038	D.ananassae,D.yakuba,D.simulans
Gene_fixed_037	D.yakuba
Gene_fixed_060	D.simulans,D.yakuba
Gene_2R_052	D.ananassae
Gene_fixed_021	D.yakuba,D.simulans
Gene_3L_090	D.simulans
Gene_fixed_053	D.ananassae,D.simulans
Gene_2R_048	D.simulans
Gene_3L_063	D.simulans
Gene_fixed_024	D.yakuba,D.simulans
Gene_fixed_013	D.yakuba
Gene_fixed_035	D.yakuba,D.simulans
Gene_2L_022	D.simulans
Gene_fixed_030	D.simulans,D.yakuba
Gene_fixed_074	D.yakuba
Gene_fixed_011	D.yakuba,D.simulans
Gene_fixed_088	D.simulans
Gene_fixed_041	D.yakuba,D.simulans
Gene_fixed_019	D.simulans
Gene_fixed_047	D.simulans
Gene_2L_037	D.yakuba
Gene_fixed_099	D.yakuba,D.ananassae
Gene_3L_061	D.simulans
Gene_3L_091	D.simulans
Gene_2L_023	D.simulans
Gene_3R_116	D.yakuba
Gene_fixed_033	D.yakuba
Gene_fixed_039	D.yakuba
Gene_3L_073	D.yakuba
Gene_fixed_091	D.yakuba,D.simulans
Gene_3R_118	D.simulans
Gene_2L_001	D.yakuba
Gene_fixed_098	D.yakuba,D.simulans
Gene_2R_049	D.simulans
Gene_fixed_065	D.yakuba
Gene_fixed_078	D.yakuba
Gene_3R_104	D.yakuba
Gene_fixed_080	D.yakuba
Gene_fixed_016	D.yakuba
Gene_fixed_058	D.simulans
Gene_3R_125	D.yakuba,D.ananassae,D.simulans
Gene_fixed_010	D.yakuba
Gene_fixed_005	D.yakuba
Gene_3R_119	D.simulans
Gene_fixed_075	D.simulans
Gene_2L_036	D.simulans
Gene_fixed_063	D.yakuba,D.simulans
Gene_fixed_023	D.ananassae
Gene_2L_028	D.simulans
Gene_3R_130	D.simulans

## Sheet: Table S4
Table S4: AG-biased ncRNA.
AG-biased ncRNA	Signal Sequence	Matches FBpp	FBpp(s)
FBgn0266643	yes	no
FBgn0264471	no	no
FBgn0265886	no	no
FBgn0265802	no	no
FBgn0263323	no	no
FBgn0267542	no	no
FBgn0266881	no	no
FBgn0265741	no	no
FBgn0265673	yes	no
FBgn0265689	no	no
FBgn0267317	no	no
FBgn0265424	no	no
FBgn0265163	yes	no
FBgn0265750	yes	no
FBgn0267154	no	no
FBgn0265789	no	no
FBgn0265202	no	no
FBgn0265674	no	no
FBgn0265864	no	yes	FBpp0309586, FBpp0297741
FBgn0266366	no	no
FBgn0267307	no	no
FBgn0267805	no	no
FBgn0264350	no	yes	FBpp0428120, FBpp0428117, FBpp0428119, FBpp0304339, FBpp0304337, FBpp0304341, FBpp0304338
FBgn0267316	no	no
FBgn0264085	no	no
FBgn0267021	yes	no
FBgn0266788	no	no
FBgn0267565	no	no
FBgn0266588	no	no
FBgn0287216	no	no
FBgn0264726	no	no
FBgn0265899	yes	no
FBgn0264338	no	no
FBgn0263090	yes	no
FBgn0265539	yes	no
FBgn0266826	yes	no
FBgn0266139	no	no
FBgn0263337	no	no
FBgn0265696	no	no
FBgn0264842	no	no
FBgn0266862	no	no
FBgn0262622	yes	no
FBgn0265592	yes	no
FBgn0266778	no	no
FBgn0263498	no	no
FBgn0263500	no	no
FBgn0267944	no	no
FBgn0263587	no	no
FBgn0266891	no	no
FBgn0265804	no	no
FBgn0265426	no	no
FBgn0266789	no	no
FBgn0263411	yes	no
FBgn0265957	no	no
FBgn0267179	no	no
FBgn0266897	no	no
FBgn0264513	yes	no
FBgn0263843	no	no
FBgn0265932	no	no
FBgn0266040	yes	no
FBgn0263866	no	no
FBgn0265788	yes	no
FBgn0263623	no	no
FBgn0262943	no	no
FBgn0266812	no	no
FBgn0267211	no	no
FBgn0266535	no	no
FBgn0266818	no	no
FBgn0262895	no	no
FBgn0267951	no	no
FBgn0263624	no	no
FBgn0265445	no	no
FBgn0265883	no	no
FBgn0266209	no	no
FBgn0263089	yes	no
FBgn0263625	yes	no
FBgn0267145	no	no
FBgn0264514	no	no
FBgn0267563	no	no
FBgn0267556	no	yes	FBpp0076506, FBpp0304451, FBpp0304452, FBpp0288464, FBpp0293610, FBpp0304453, FBpp0076505, FBpp0288465
FBgn0265803	no	no
FBgn0263331	no	no
FBgn0264349	no	no
FBgn0265900	no	no
FBgn0263622	no	no
FBgn0267868	no	no
FBgn0265798	no	no
FBgn0265842	no	no
FBgn0265922	no	no
FBgn0264359	no	no
FBgn0265906	no	no
FBgn0264336	no	no
FBgn0287215	no	no
FBgn0265665	no	no
FBgn0265694	yes	no
FBgn0266642	no	yes	FBpp0309686,FBpp042818,7FBpp0291841,FBpp0428183,FBpp0309687,FBpp0428185,FBpp0291846,FBpp0291847,FBpp0310601
FBgn0267450	no	yes	FBpp0083307
FBgn0265270	yes	no
FBgn0263868	no	no
FBgn0263505	no	no
FBgn0264857	yes	no
FBgn0263085	no	no
FBgn0267463	no	no
FBgn0267268	no	no
FBgn0264352	no	no
FBgn0267024	yes	yes	FBpp0086930
FBgn0263410	no	no
FBgn0266651	no	no
FBgn0266687	no	no
FBgn0265934	no	no
FBgn0264715	no	no
FBgn0262564	no	no
FBgn0265786	no	no
FBgn0264337	no	no
FBgn0267682	no	yes	FBpp0082113
FBgn0267561	no	no
FBgn0267752	no	no
FBgn0267267	no	no
FBgn0265682	no	no
FBgn0265672	no	no
FBgn0266896	no	no
FBgn0266969	no	no
FBgn0083990	yes	no
FBgn0263451	no	yes	FBpp0083668
FBgn0266308	yes	no
FBgn0264518	no	no
FBgn0266738	no	no
FBgn0263708	no	no
FBgn0264716	no	no
FBgn0264843	no	no
FBgn0265739	no	no
FBgn0265165	no	no
FBgn0267607	no	no
FBgn0267564	no	no
FBgn0263502	no	no
FBgn0267987	no	no
FBgn0267969	no	no
FBgn0266882	no	no
FBgn0266903	yes	yes	FBpp0306504
FBgn0263095	no	no
FBgn0263663	no	no
FBgn0265748	no	no
FBgn0265905	no	no
FBgn0265805	no	no
FBgn0263501	no	no
FBgn0265204	no	no
FBgn0266257	yes	no
FBgn0266645	no	yes	FBpp0308618, FBpp0311193, FBpp0071739
FBgn0286869	no	no
FBgn0266791	no	no
FBgn0265907	no	no
FBgn0266394	no	no
FBgn0266033	no	no
FBgn0265849	no	no
FBgn0264083	no	no
FBgn0265095	no	no
FBgn0263867	no	no
FBgn0267147	no	no
FBgn0266764	yes	no
FBgn0266037	no	no
FBgn0267543	yes	no
FBgn0263967	no	no
FBgn0267540	yes	no
FBgn0264565	no	no
FBgn0265370	no	no
FBgn0266407	no	no
FBgn0266213	no	no
FBgn0266589	yes	no
FBgn0265787	no	no
FBgn0267562	no	no
FBgn0264701	no	no
FBgn0264373	no	no
FBgn0264515	no	no
FBgn0266536	no	no
FBgn0264512	no	no
FBgn0266365	no	no
FBgn0266096	no	no
FBgn0283626	yes	no
FBgn0266839	no	no
FBgn0265702	no	no
FBgn0265898	no	no
FBgn0267926	no	no
FBgn0265982	no	no
FBgn0265904	no	no
FBgn0267755	no	no
FBgn0265000	no	no
FBgn0265581	no	no
FBgn0264480	yes	no
FBgn0267032	no	no
FBgn0265164	no	no
FBgn0265062	no	no
FBgn0264564	yes	yes	FBpp0305613, FBpp0079857
FBgn0287670	yes	no
FBgn0266068	yes	no
FBgn0286033	no	no
FBgn0261861	no	no
FBgn0267127	no	no
FBgn0266398	no	no
FBgn0265939	yes	no
FBgn0264709	no	no
FBgn0267215	no	no
FBgn0264553	yes	no
FBgn0266240	yes	no
FBgn0265446	yes	no
FBgn0267452	no	yes	FBpp0304430
FBgn0266790	no	no
FBgn0266247	no	no
FBgn0266785	no	no
FBgn0265657	no	no

## Sheet: Table S5
Table 1
Table S5: AG-biased ncRNA ORFs.
ORF ID	ORF
FBgn0262622:FBtr0344572_ORF_3	MPRSFYAFLYNFFSAFLSCYNSAATAVKNNIPTPAPNRQPQLVQHHKPICVFN
FBgn0265750:FBtr0340712_ORF_4	MLFCLLLLVLFVVWQYNSIASTIKGYHL
FBgn0266645:FBtr0344940_ORF_1	MAENGLRVPGSSAVASAVASTATGVGGGSAAGTAGAGTGVVPTGVSGGTSNGEHENEHNANADGEKAQPAPAVQKYMQELMTERSRMENHFPLAVKLIDEGKLICQGHFMVITLISLCFCSSGACAAKRTHS
FBgn0264350:FBtr0346760_ORF_1	MIKFVLHIVDEEGMITARPRRMSEVNTATKILPIPPGTSFFLFSQTNRFLCLSFIFPPNIESVRKYYIYIYIFVCMCACA
FBgn0267556:FBtr0346947_ORF_1	MIDCADNIAAYLENPAVGLNNQSLDILQRGRWSMESTVVEVGVSSTDLPRNNNIIDMVQDAVTAALSHTGARNYTVVQLPTVYTNENGETSQQRTAEAITSEGAASGAASNASGETTAATVIIEDVIETDDEVADGASDRSVTPTPEPEAEGAVGGQQVTAAETPTSSVGSANDAAAEGGNNSGPRRRTRPQVLAQVIQHYRGVQARLAPFVDRYYEILQNDPTFEESVS
FBgn0263090:FBtr0345440_ORF_1	MSLLYLIIGSFVLMGTPCPPMAPRCRL
FBgn0266257:FBtr0343924_ORF_5	MGAMICLFVCLFVVCCSCHYKFHFGQNGSRCVCAWI
FBgn0264564:FBtr0344129_ORF_2	MRCLAFIAFCLSALLAMAVGQVFQYSCPCPRNYDPVCGSDSVTVEKKGR
FBgn0267540:FBtr0346936_ORF_3	MFNPEMRMTEWRRVMLLLPAVLIVVRKSCSGFPPGVCQTEHEL
FBgn0265694:FBtr0340606_ORF_4	MLQCFYAAMPMCFLASMIKCTEKNQWHISKYSAFRCQQDIIYLNSFKIIKHYS
FBgn0264513:FBtr0346597_ORF_5	MKTLVFQLLALSCLMRMVVSEIKPDAAWLKKNEDLVKWCHLNQGSLWDREKCVYNGIT
FBgn0264480:FBtr0332767_ORF_1	MLISCANMFKFLMIIIVALLELTKALDSPGVATQRPPVGDKVVYPEEDKQYIDIR
FBgn0263090:FBtr0307108_ORF_1	MSLLYLIIGSFVLMGTPCPPMAPRCRL
FBgn0265446:FBtr0339795_ORF_1	MHLIYPCSPLVLAPFLLLLCTPDVSSNLLTQILAQVLEHSTTCWVIVISSAQ
FBgn0267543:FBtr0346939_ORF_3	MRMTEWRRVMLLLPAVLIVVRKSCSGFPPGVCQTEHEL
FBgn0265788:FBtr0345757_ORF_1	MKVLRIMGILLLAYLYCLLLTQSKDGTICIKACHIPY
FBgn0266903:FBtr0345770_ORF_4	MPAPPATVKPATGHTTKLNNGKSSNSNSNHTLSNSIAHLSDSRTNLTVNTPTTCQRLRYDTLAALGF
FBgn0266068:FBtr0343395_ORF_1	MPSKCHRKEASLLCLIVFICEAILSAGSFCRGRLECQMALKGKMIMRSGVLLCTKKHQFTCVDQVCVCGRPEKCNQ
FBgn0265673:FBtr0340566_ORF_1	MPRCIQFSISPPAVRVPICFACPAMTHRSLKFPSSSLLLLLAMLLCLFAGLANSCCRCCLGESCTDLNCCPWCPSAVTLDWRTIS
FBgn0264513:FBtr0333130_ORF_3	MKTLVFQLLALSCLMRMVVSEIKPDAAWLKKNEDLVKWCHLNQGSLWDREKCVYNGIT
FBgn0266903:FBtr0445833_ORF_5	MPAPPATVKPATGHTTKLNNGKSSNSNSNHTLSNSIAHLSDSRTNLTVNTPTTCQRLRYDTLAALGF
FBgn0265163:FBtr0337084_ORF_2	MLAKGMHLQQTPFFCFCVYPGRHCCCVVGVAWLLLLTCCCSCRCICCYCCCGKCDGGFGCQQWLMPTM
FBgn0267021:FBtr0345965_ORF_4	MVPVWLAFWSIDVSHLHADHQPGQLNSSQLNSG
FBgn0263625:FBtr0309987_ORF_1	MNLYLAFILASISGISCAPQTEGGSAPYIYVCNPPNPACLLYKQFNDTRT
FBgn0083990:FBtr0111045_ORF_5	MAAWIFTAILFTLAVFKTQKPNRYSLVLPASGTSCGKCRICCRCRTTGQRPLVVL
FBgn0265539:FBtr0340130_ORF_1	MKMKVAIILLAVCGLAMATPPVDFVTVKPIPGVPPMAPEGK
FBgn0083990:FBtr0334622_ORF_3	MAAWIFTAILFTLAVFKTQKPNRYSLVLPASGTSCGKCRICCRCRTTGQRPLVVL
FBgn0264553:FBtr0333283_ORF_3	MKIFGYILILIVTMIEVNGVLTVEECQKFLNPPIQLR
FBgn0267024:FBtr0345977_ORF_5	MMLRKGQTSGLYQYGVLCHFSRGKIANELVYRASAHPGSRCYAGTHSIY
FBgn0265939:FBtr0342904_ORF_4	MTFFAIFYVLALLLLLTPYTHESAKVESGDVAL
FBgn0264857:FBtr0336887_ORF_4	MCNQTWATSFVRRPLFLHFFCFCLGDDAVAESPSKFLRSLARSQSCFLGL
FBgn0265899:FBtr0342774_ORF_3	MLIENICTPCNQSARIIIILLLFPVCGCASFEHSSP
FBgn0267682:FBtr0347172_ORF_2	MHRISTPSWHHMDFVHSMTVANVINKPVIEIFKRFEQPIDCKGSL
FBgn0264564:FBtr0344128_ORF_2	MRCLAFIAFCLSALLAMAVGQVFQYSCPCPRNYDPVCGSDSVTYSNQCVLDCLI
FBgn0265788:FBtr0342619_ORF_1	MKVLRIMGILLLAYLYCLLLTQSKDGTICIKACHIPY
FBgn0265270:FBtr0345642_ORF_2	METHRSSFWILAILARISTTFGMCDPRCAGFGDCCP
FBgn0266308:FBtr0344037_ORF_4	MGSSCVMVLLVCRWCCQDDVAQCADFRVVPKELAC
FBgn0266643:FBtr0344938_ORF_4	MERNQGVCIPAGLCVLCAMPYTYSHTFICGTIE
FBgn0265270:FBtr0339798_ORF_2	METHRSSFWILAILARISTTFGMCDPRCAGFGDCCP
FBgn0267021:FBtr0345966_ORF_3	MNLFTFIFVCVCVLLFWSHRHTDRRERIPYSNRIHRSLDRIWLFDGQYPEMCS
FBgn0266642:FBtr0344937_ORF_1	MTTPLLGASGSVPAPSGRESILKQQGSVKADKRVSIQQMATSNNNNNNSTKLTPNVEYVSERQPEVQGAGKRLTTKPPPGNVHQVVPAAALLLSGLRRRGGPGTPDHDKDHLAGTAGGRGISPFRLYSAKMT
FBgn0267556:FBtr0346947_ORF_2	MLDLSQPGPRVLTCRPILVEQSGYIRSNNIFTPNFLAPPSGIINEPFRNRAPGSASAAGTQTATTAGTQTPTSAGTPTAVAPSQAANLQAATDASRSAAAMAEIASRAAGAAAEMAAGAASAAAGAANAAAAAARDLSSDQVEDPIDEPMVGPNAAG
FBgn0083990:FBtr0111044_ORF_4	MAAWIFTAILFTLAVFKTQKPNRYSLVLPASGTSCGKCRICCRCRTTGQRPLVVL
FBgn0266764:FBtr0345372_ORF_3	MCALWHFIFLQLHGLNVLGLVDDPRFGPGQVPIW
FBgn0267452:FBtr0346823_ORF_1	MVILEIYETLTFLSVHISADQGTQTDSLLITEEEPAPEATDQPLGNGVNKTPLRKSASFSSTSTSSPASSSMGSATSTMSLRSSTPLRSHNHSQSSRALRSDTINTFQKWETTIESISYVSTKTVSISDFTQEPQIECCFHIESIINHRLNASFRSSSDLENC
FBgn0266589:FBtr0344810_ORF_4	MYPHSFSEMPMCLALIGCLCLGGRSQLNMR
FBgn0283626:FBtr0445677_ORF_1	MYTSTFIIFWILGVASPILIPPFCKVAKHFLYLYQLIKLQVTC
FBgn0266040:FBtr0343260_ORF_1	MNNINATMMLKKTIILILLAALLDKSGAKKVDGYKWCTVVKNGVCVN
FBgn0263089:FBtr0345721_ORF_3	MFGLCFFFLRPILSFGLGLAPKDLCA
FBgn0265270:FBtr0306294_ORF_2	METHRSSFWILAILARISTTFGMCDPRCAGFGDCCP
FBgn0263411:FBtr0309190_ORF_1	MILLKSQWHFTITSVLLLWLTLDMGNAEHVAIIGHWRKSDILLLNKNIFVPGRRRAKVSHKFHYTQEVKTMISPRLEPREVCSKVAQIISTAPFDCRQE
FBgn0262622:FBtr0344571_ORF_3	MPRSFYAFLYNFFSAFLSCYNSAATAVKNNIPTPAPNRQPQLVQHHKPICVFN
FBgn0267450:FBtr0346803_ORF_1	MPAPLAPGTQQLTSGLLPNNLHGSTANIIQLDHHPLLHFLDGSTTVSSVVATAAANTKVEHFQAGGSPSGRMTVVGTINMLKGDNPDRPFGCSVCQRFFSQQSTLVNHIKTHTGEKPYKCKICEVNFRQVATLNNHMKIHTGEKPYNCSFCPKQFRQKSTLQNHLRVHTC
FBgn0266642:FBtr0344936_ORF_1	MTTPLLGASGSVPAPSGRESILKQQGSVKADKRVSIQQMATSNNNNNNSTKLTPNVEYVSERQPEVQGAGKRLTTKPPPGNVHQV
FBgn0266589:FBtr0344810_ORF_5	MGMRWLPGWLAGWAPLHATGVYCNFIK
FBgn0266903:FBtr0445833_ORF_3	MRKMFQWLIVLFPQRNVSAFDCQQHSVQFQGKYLRGGKTNIHMNKRSSFDKTLRKETILITNVYRKIINEVLRVKYLGI
FBgn0263451:FBtr0309306_ORF_1	MNNTNTTRGTCSRIPIASKQEPTIASMVERFVQSLSQLNDSGTFDSSFEIKRIHPGSSAGSTPKHVRHRCLTELDREQLTRFVQDFEERQASTPKVKSKISSPYICRKAKEFYQSASGRRSASPQITIAPETVQEEKVLVNPLPRKCAEAEDLMPPPMAMARVQAERRSCRSASRVLQFFSSATKRRSGNRKLSEPEMEDNRADSPVLIRVTRDRVEEQLGCSPLAASGGEVPTSSEDEEEHDDGISSASSNLTSQSGSSNSRNLSPDSSFEMHAPLLPSFKVTPPRAVCRVGKNAACEFARFLRGSFHSKRASVTTLRRSLSDPDAVQQMDFSKPPPL
FBgn0267024:FBtr0345977_ORF_4	MLYLLSVLIIVLISQEALSTDYCNKDLCLPEITHIACRNYGVSLASHQVAQ
FBgn0265592:FBtr0340285_ORF_1	MCVKTWHFFMPLLLLFSNDFTDTLSPHRRGARTKCGTSSVLVPHIGIPWSRVPITARKIA
FBgn0267024:FBtr0345977_ORF_1	MKFPMHMRAHLLAVLNDFRNTVAKGQYPHLRPASRMATLRWHEELAGLAKFALRRCDYIDDYCSNTDEFSYVSYIYGSTKWLQLEKDPISVLDFVLQFWMDDVKGCTMAHINAEKPAKDG
FBgn0266240:FBtr0343905_ORF_3	MCFIVAFSHTLFIYLFVSSVPLGSFGFPAPIQM
FBgn0265864:FBtr0342703_ORF_2	MYEKADAEKCHQPEMRNVQDFLECQVRRHMRLELLIPKYPNVPPI
FBgn0287670:FBtr0480518_ORF_1	MHYGPISCLLSIKGLLWLSLIAKLIYPSHFKIPWVSECEKSAKCKNRCRVTSRQPHDRPVRTAPPCHPRGRVQSGVATPSELPTPVHRFLTAIYRFPYRSHSCRHCVVAAAAAACCCCLSLAHVAVC
FBgn0266826:FBtr0345553_ORF_1	MFSAPFFLFFFDAIYLTSFCGPSAVALQIV

## Sheet: Table S6
Table S6: Comparison of AG-biased ncRNA vs. de novo Genes in 500kb Windows.
	AG Biased ncRNA Absent		AG Biased ncRNA Present		AG de novo genes / AG-biased ncRNA absent	AG de novo genes / AG-biased ncRNA present	Fisher’s Exact Test
Chromosome	de novo Genes Absent	de novo Genes Present	de novo Genes Absent	de novo Genes Present
All	141	37	47	55	0.2079	0.5392	3.47e-08
2L	18	3	10	17	0.1429	0.6296	0.00102
2R	26	7	8	10	0.2121	0.5556	0.0276
3L	30	3	15	9	0.0909	0.375	0.0187
3R	29	14	8	14	0.3256	0.6364	0.0201
X	29	9	6	4	0.2368	0.4	0.425
4	1	1	0	1	0.5	1	1
Y	8	0	0	0	NA	NA	NA

## Sheet: Table S7
TABLE S7: Comparison of Tissue Biased vs. de novo Genes in 100kb Windows
		Tissue Biased Genes Absent		Tissue Biased Genes Present		% Windows with de novo Genes in Windows with No Tissue Biased Genes	% Windows with de novo Genes in Windows with Tissue Biased Genes	Fisher’s Exact Test
Tissue	Chromosome	de novo Genes Absent	de novo Genes Present	de novo Genes Absent	de novo Genes Present
AG	All	1052	67	225	35	0.0598749	0.134615	0.00011
AG	2L	155	16	55	10	0.0935673	0.153846	0.24
AG	2R	192	14	43	4	0.0679612	0.0851064	0.75
AG	3L	220	6	50	6	0.0265487	0.107143	0.017
AG	3R	231	21	59	10	0.0833333	0.144928	0.16
AG	X	205	9	18	4	0.0420561	0.181818	0.023
AG	4	12	1	0	1	0.0769231	1	0.14
AG	Y	37	0	0	0	NA	NA	NA
Testis	All	350	13	892	124	0.0358127	0.122047	3.866e-07
Testis	2L	39	3	163	31	0.0714286	0.159794	0.223
Testis	2R	74	3	161	15	0.038961	0.0852273	0.2874
Testis	3L	74	4	169	35	0.0512821	0.171569	0.007023
Testis	3R	72	1	216	32	0.0136986	0.129032	0.001959
Testis	X	62	2	161	11	0.03125	0.0639535	0.5226
Testis	4	9	0	5	0	0	0	1
Testis	Y	20	0	17	0	0	0	1

## Sheet: Table S8
TABLE S8: Regulatory Mechanisms for de novo Genes.
Tissue	Category	Cross	Gene	Ch	Start	Stop	P1	P1_TPM	P2	P2_TPM	Cross_TPM	P1sep_count	P2sep_count	Binomial	Regulatory
AG	Intergenic	357x399	TRINITY_DN35049_c0_g1	3R	17520078	17520505	357	6.12291	399	0.097109	6.58038	113	4	9.25e-29	Cis+Trans
AG	Intronic	360x517	TRINITY_DN10355_c0_g2	3R	22189379	22193094	360	0.101664	517	2.10569	0.626632	20	71	7.25e-08	Cis-Trans
AG	Intronic	357x399	TRINITY_DN15969_c0_g1	3R	20052851	20053196	357	2.06826	399	0	0.742693	4	6	0.754	Trans
AG	Intergenic	357x399	TRINITY_DN325_c0_g1	2L	17065890	17069356	357	52.6573	399	0	14.9101	283	2	1.31e-81	Cis-Trans
AG	Intergenic	357x399	TRINITY_DN7014_c0_g1	3L	18452673	18454011	357	0	399	3.99132	2.42683	0	25	5.96e-08	Cis
AG	Intergenic	360x517	TRINITY_DN45939_c0_g1	2L	3249419	3249908	360	5.42017	517	0	17.5604	267	2	7.66e-77	Cis+Trans
AG	Intronic	357x399	TRINITY_DN9859_c0_g1	3R	21710727	21712682	357	3.88558	399	0	1.37187	45	0	5.68e-14	Cis-Trans
AG	Intronic	357x399	TRINITY_DN39186_c0_g1	2L	11503854	11504203	357	1.69066	399	0	0.648421	5	6	1	Trans
AG	Intergenic	357x399	TRINITY_DN3017_c1_g1	2R	20759923	20761341	357	0	399	1.64393	1.37283	1	59	1.06e-16	Cis+Trans
AG	Intergenic	357x399	TRINITY_DN8012_c1_g1	X	18597407	18599092	357	0	399	1.87802	1.65792	16	23	0.337	Trans
AG	Intronic	357x399	TRINITY_DN7414_c0_g1	3R	28054751	28056067	357	19.0752	399	0.112209	1.90546	63	1	7.05e-18	Cis-Trans
AG	Intronic	360x517	TRINITY_DN38055_c0_g1	3R	7687951	7688797	360	12.217	517	0.090427	4.70998	109	2	4.79e-30	Cis-Trans
AG	Intergenic	357x399	TRINITY_DN44707_c0_g1	X	18599926	18600634	357	0	399	7.13156	8.68073	0	185	4.08e-56	Cis+Trans
Testis	Segregating	307x304	Gene_2L_012	2L	6847651	6848367	307	3.08473	304	0	1.30361	21	0	9.53674e-07	Cis
Testis	Segregating	360x517	Gene_2R_047	2R	16459223	16460461	360	0	517	5.56864	4.54253	0	97	1.26218e-29	Cis+Trans
Testis	Segregating	307x304	Gene_3L_088	3L	15769254	15769946	307	18.36	304	0.103605	3.8863	21	0	9.53674e-07	Cis-Trans
Testis	Segregating	307x304	Gene_3R_102	3R	12889599	12890397	307	0.051878	304	4.84704	1.39174	0	24	1.19209e-07	Cis-Trans
Testis	Segregating	307x304	Gene_3R_131	3R	30664700	30665711	307	2.12934	304	0	0	18	1	7.62939e-05	Cis-Trans
Testis	Segregating	360x517	Gene_2L_017	2L	11629752	11630546	360	0	517	9.7633	2.22297	0	43	2.27374e-13	Cis-Trans
Testis	Segregating	307x304	Gene_2L_009	2L	4141381	4141834	307	0.0451	304	4.30766	2.732	0	45	5.68434e-14	Cis+Trans
Testis	Segregating	307x304	Gene_2L_005	2L	3230267	3231582	307	4.22428	304	0.108988	2.63385	27	0	1.49012e-08	Cis
Testis	Segregating	360x517	Gene_2L_025	2L	14536740	14537626	360	5.2151	517	0	14.4698	114	0	9.62965e-35	Cis+Trans
Testis	Segregating	307x304	Gene_2L_008	2L	4139419	4140226	307	20.4251	304	0.058922	11.8511	212	0	3.03858e-64	Cis
Testis	Segregating	357x399	Gene_3L_059	3L	611991	612795	357	6.92256	399	0	3.05213	17	5	0.0169005	Ambiguous
Testis	Segregating	357x399	Gene_3R_115	3R	26153799	26154613	357	4.97527	399	0.133395	6.36634	182	8	4.83365e-44	Cis+Trans
Testis	Segregating	307x304	Gene_2L_029	2L	15817531	15818025	307	7.11553	304	0	2.88299	27	0	1.49012e-08	Cis
Testis	Segregating	357x399	Gene_3L_064	3L	5289724	5291525	357	2.52364	399	0	1.19664	56	0	2.77556e-17	Cis
Testis	Segregating	307x304	Gene_3R_117	3R	26390775	26391669	307	0.08139	304	4.76386	2.03796	0	10	0.00195312	Ambiguous
Testis	Segregating	360x517	Gene_3L_081	3L	11915900	11916495	360	0	517	6.96204	3.20859	0	28	7.45058e-09	Cis
Testis	Segregating	360x517	Gene_2L_031	2L	16164123	16164926	360	0.063547	517	22.6521	0	1	30	2.98023e-08	Cis-Trans
Testis	Segregating	357x399	Gene_3L_087	3L	14253233	14254205	357	4.87387	399	0	0	5	17	0.0169005	Trans
Testis	Segregating	357x399	Gene_3L_086	3L	13316861	13318585	357	22.0889	399	0.166782	18.683	468	1	6.1668e-139	Cis+Trans
Testis	Segregating	357x399	Gene_3R_112	3R	21454171	21455755	357	2.6715	399	0.114307	6.878	200	1	1.25705e-58	Cis+Trans
Testis	Segregating	307x304	Gene_2R_054	2R	20690619	20691202	307	4.42493	304	0	3.68299	60	0	1.73472e-18	Cis+Trans
Testis	Segregating	357x399	Gene_2L_006	2L	3241020	3241656	357	0	399	3.66904	0.812928	0	15	6.10352e-05	Cis-Trans
Testis	Segregating	357x399	Gene_3R_105	3R	13619036	13620115	357	2.08834	399	0.099642	14.144	187	0	1.01958e-56	Cis+Trans
Testis	Segregating	357x399	Gene_3L_088	3L	15769254	15769946	357	1.37334	399	0.157391	2.36954	14	6	0.115318	Trans
Testis	Segregating	360x517	Gene_3L_064	3L	5289724	5291525	360	0	517	5.07937	1.06867	1	45	1.33582e-12	Cis-Trans
Testis	Segregating	307x304	Gene_3R_110	3R	20490395	20491421	307	0	304	14.737	4.10648	1	104	5.2262e-30	Cis-Trans
Testis	Segregating	357x399	Gene_3R_106	3R	16794473	16796304	357	0.039998	399	2.85765	3.62642	12	0	0.000488281	Cis*Trans
Testis	Segregating	360x517	Gene_2R_050	2R	18193559	18194700	360	0.174982	517	4.46017	1.75537	9	25	0.00904119	Trans
Testis	Segregating	360x517	Gene_3L_069	3L	5959071	5961057	360	0.11919	517	14.195	7.85321	4	184	2.62605e-49	Cis
Testis	Segregating	360x517	Gene_X_138	X	17048909	17049931	360	1.04319	517	0	4.35519	0	21	9.53674e-07	Cis*Trans
Testis	Segregating	307x304	Gene_3L_082	3L	12299907	12300720	307	5.44678	304	0	2.06965	12	0	0.000488281	Cis-Trans
Testis	Segregating	360x517	Gene_3R_122	3R	28240988	28247494	360	1.54065	517	0.022612	2.06526	33	0	2.32831e-10	Cis+Trans
Testis	Segregating	360x517	Gene_3L_075	3L	9241219	9243256	360	0	517	8.15668	3.12192	0	17	1.52588e-05	Cis-Trans
Testis	Segregating	307x304	Gene_3R_123	3R	28313957	28314894	307	0.132595	304	17.4271	5.51093	1	132	2.46119e-38	Cis-Trans
Testis	Segregating	357x399	Gene_2L_025	2L	14536740	14537626	357	0	399	16.6891	18.978	0	256	1.72723e-77	Cis+Trans
Testis	Segregating	357x399	Gene_2L_017	2L	11629752	11630546	357	0	399	5.89105	1.70911	0	32	4.65661e-10	Cis-Trans
Testis	Segregating	360x517	Gene_2L_002	2L	2484417	2486995	360	0.118829	517	6.48664	3.15584	1	17	0.000144958	Cis
Testis	Segregating	360x517	Gene_3R_105	3R	13619036	13620115	360	39.6865	517	0.040768	14.996	318	0	3.74534e-96	Cis-Trans
Testis	Segregating	360x517	Gene_3L_095	3L	22020299	22021013	360	0	517	6.13321	2.03162	0	33	2.32831e-10	Cis-Trans
Testis	Segregating	307x304	Gene_2R_057	2R	21960028	21960353	307	6.65403	304	0	3.76846	16	0	3.05176e-05	Cis
Testis	Segregating	360x517	Gene_2R_057	2R	21960028	21960353	360	0.10212	517	8.57301	4.8938	2	51	3.17968e-13	Cis
Testis	Segregating	360x517	Gene_3L_079	3L	11843506	11844558	360	0	517	2.61394	1.0112	0	43	2.27374e-13	Cis-Trans
Testis	Segregating	360x517	Gene_2L_012	2L	6847651	6848367	360	0.047498	517	28.0365	11.759	0	46	2.84217e-14	Cis
Testis	Segregating	360x517	Gene_2R_056	2R	21948780	21949886	360	0	517	1.66612	3.0998	55	25	0.00105273	Cis*Trans
Testis	Segregating	360x517	Gene_2R_043	2R	14812173	14812827	360	0	517	5.95444	2.52636	0	28	7.45058e-09	Cis
Testis	Segregating	360x517	Gene_3R_101	3R	8271438	8276988	360	0	517	2.49004	1.0496	6	61	1.49444e-12	Cis
Testis	Segregating	360x517	Gene_3L_077	3L	10400843	10401655	360	57.1691	517	0	37.5032	832	1	0	Cis+Trans
Testis	Segregating	360x517	Gene_3R_111	3R	20518642	20521436	360	2.36882	517	0	0	46	106	1.25731e-06	Cis*Trans
Testis	Segregating	307x304	Gene_3R_105	3R	13619036	13620115	307	0.038392	304	53.8217	21.8685	1	147	8.35174e-43	Cis
