# Supplementary material
Source: publisher figshare collection journal article supplement (https://gsajournals.figshare.com/articles/dataset/_/16934209)

Maximum TPM per AG de novo gene

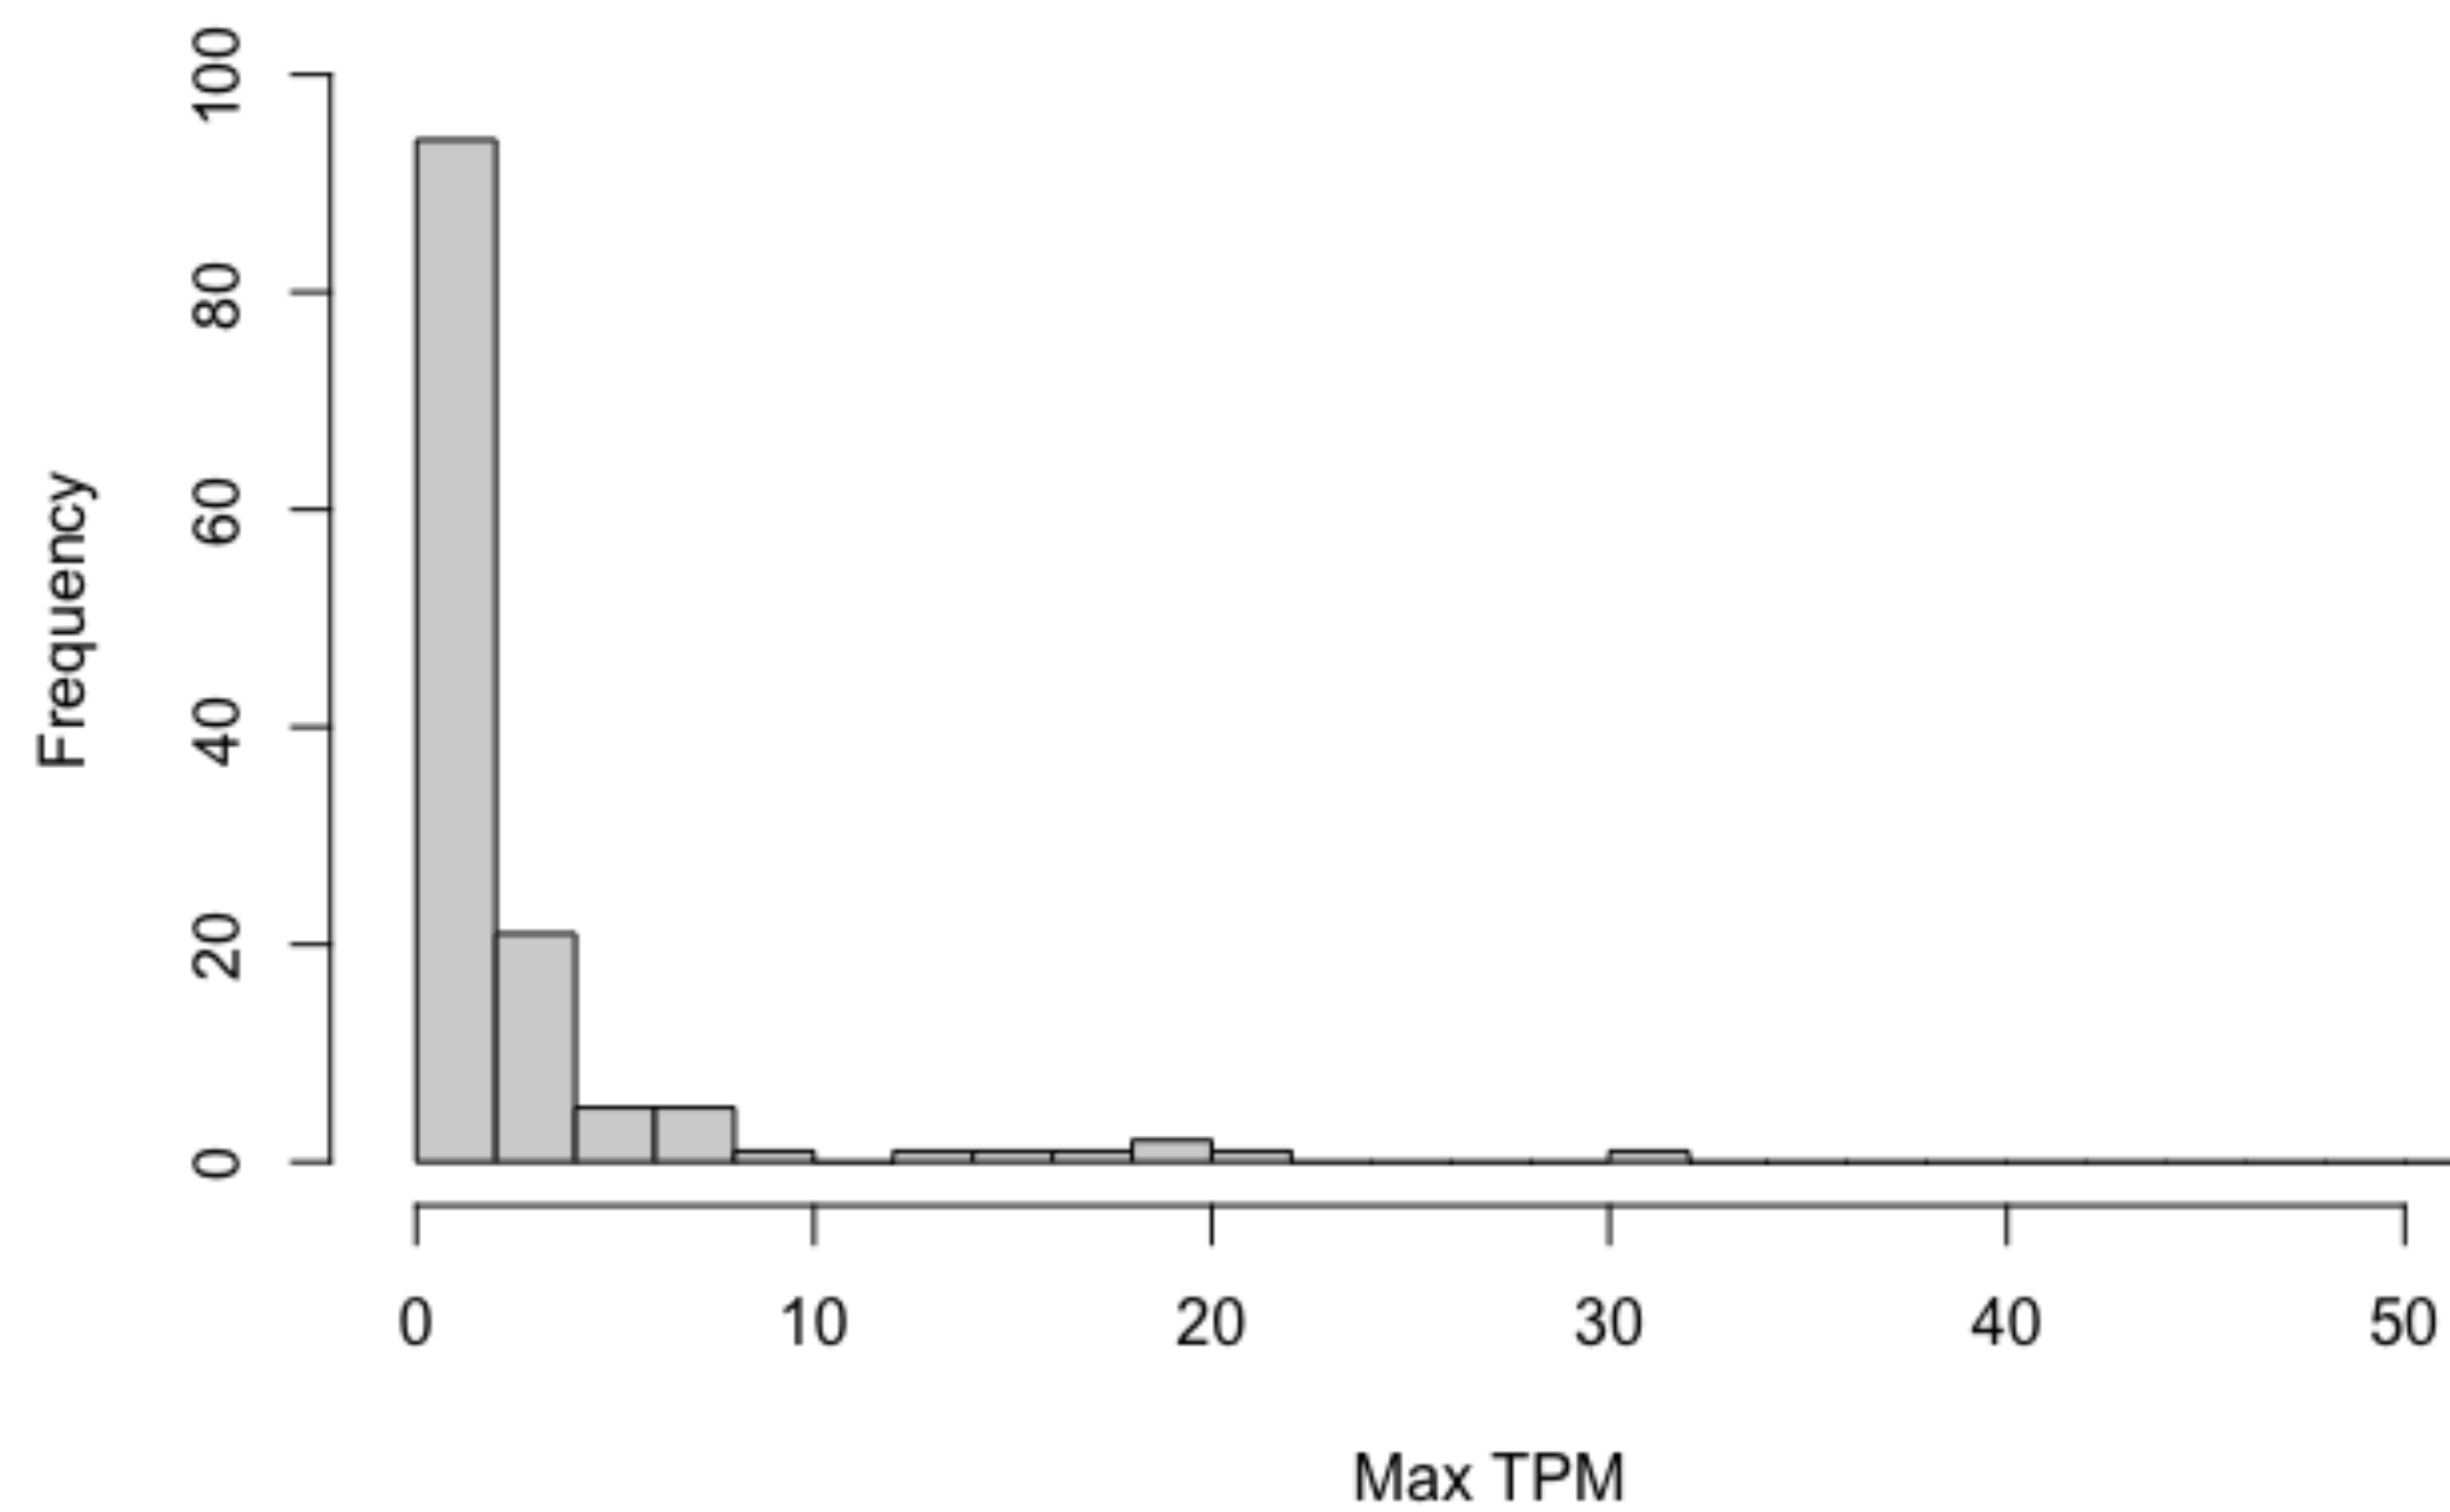

Supplement: Supplementary file 1 [file 2]

Coding Potential of D.melanogaster Protein Coding Genes

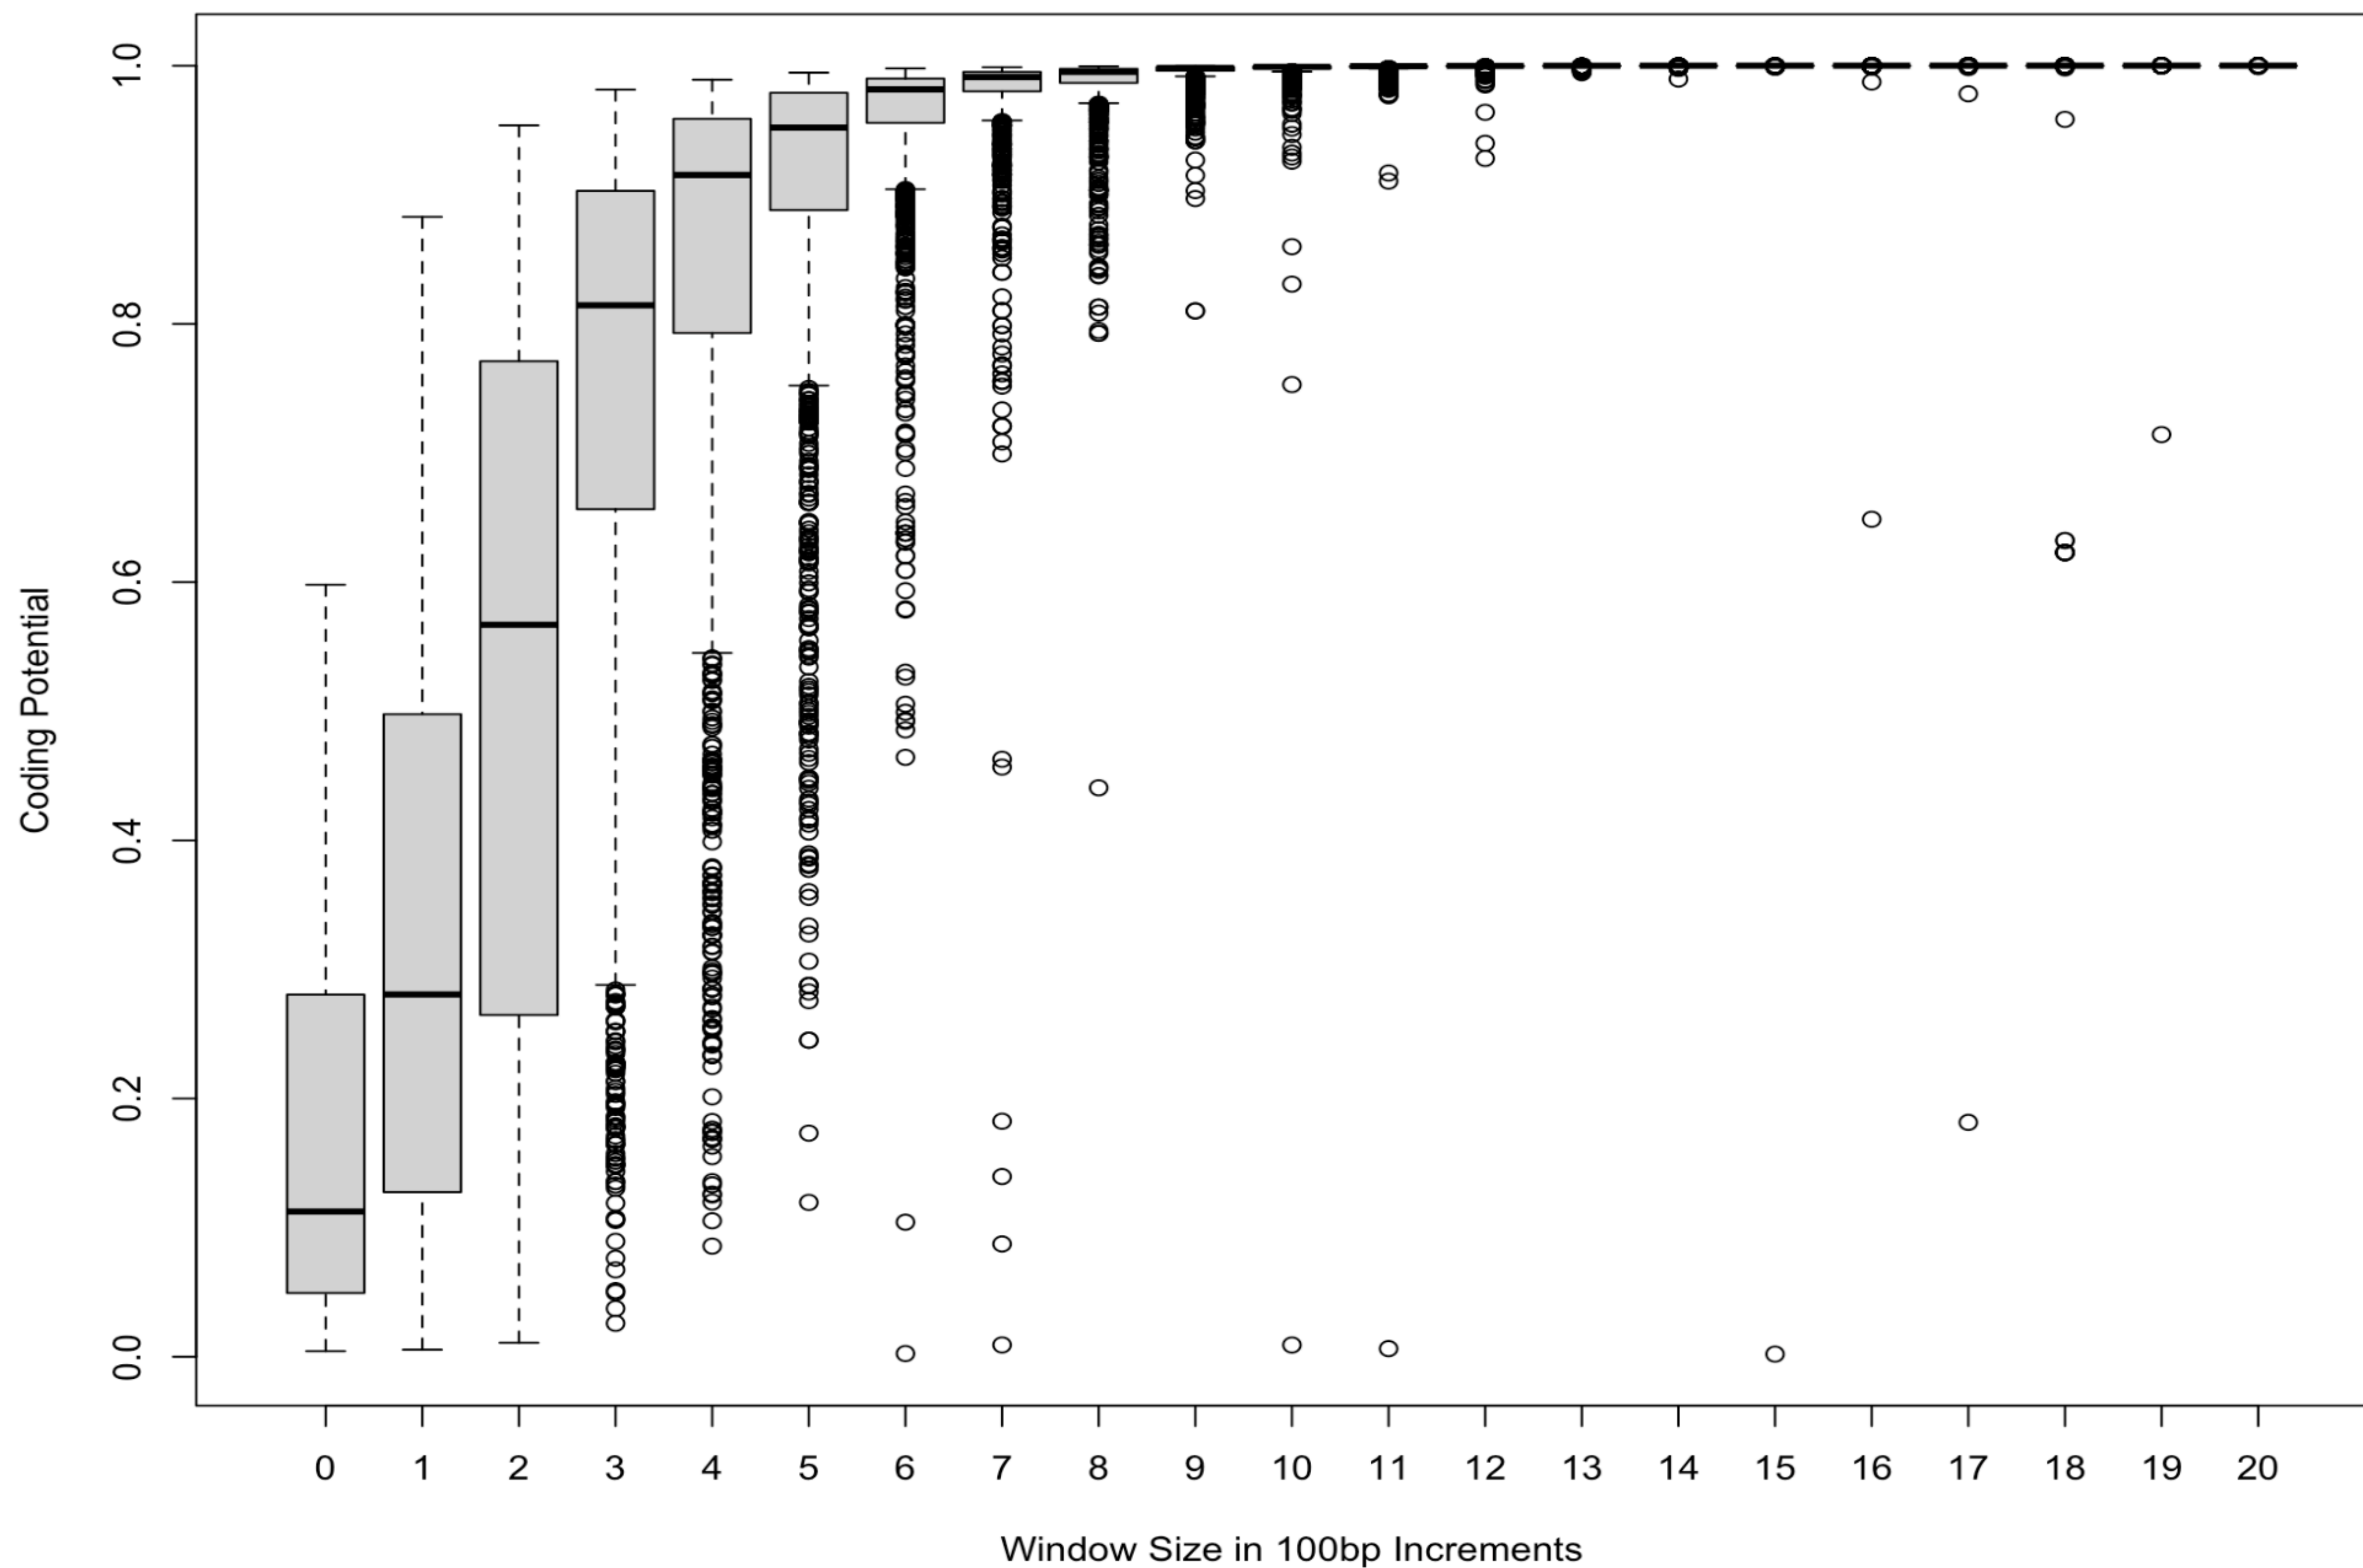

Supplement: Supplementary file 2 [file 2]
